# Supplementary material for: Life-Cycle Assessment of the Breezhaler® Breath-Actuated Dry Powder Inhaler
Source: MDPI journal article supplement (doi:10.3390/su13126657), 2021-06-11
Supplement: s1 [file s1]

**Supplementary Table S3.** Results for the 30-day device (with and without digital companion) and 90-day device for each impact category per FU.

|                                                      | Geographical region | Climate change<br>(kg CO <sub>2</sub> eq) | Freshwater eco-toxicity<br>(CTUe) | Freshwater use (m <sup>3</sup> ) | Resource depletion (kg Sb eq) | Ozone depletion (kg CFC-11 eq) | Acidification potential (mol H <sup>+</sup> eq) |
|------------------------------------------------------|---------------------|-------------------------------------------|-----------------------------------|----------------------------------|-------------------------------|--------------------------------|-------------------------------------------------|
| <b>30-day device<br/>(with digital companion)</b>    | Germany             | 0.435                                     | 0.609                             | 2.543                            | 7.01E-05                      | 4.47E-08                       | 2.40E-03                                        |
|                                                      | France              | 0.450                                     | 0.658                             | 2.545                            | 7.01E-05                      | 4.46E-08                       | 2.41E-03                                        |
|                                                      | UK                  | 0.453                                     | 0.609                             | 2.544                            | 7.01E-05                      | 4.47E-08                       | 2.41E-03                                        |
|                                                      | Japan               | 0.459                                     | 0.638                             | 2.545                            | 7.01E-05                      | 4.59E-08                       | 2.85E-03                                        |
| <b>30-day device<br/>(without digital companion)</b> | Germany             | 0.313                                     | 0.320                             | 1.787                            | 4.24E-06                      | 3.27E-08                       | 1.43E-03                                        |
|                                                      | France              | 0.328                                     | 0.336                             | 1.788                            | 4.29E-06                      | 3.26E-08                       | 1.44E-03                                        |
|                                                      | UK                  | 0.330                                     | 0.319                             | 1.788                            | 4.24E-06                      | 1.43E-03                       | 1.44E-03                                        |
|                                                      | Japan               | 0.336                                     | 0.318                             | 1.789                            | 4.29E-06                      | 3.39E-08                       | 1.87E-03                                        |
| <b>90-day device<br/>(without digital companion)</b> | Germany             | 0.135                                     | 0.145                             | 0.961                            | 1.69E-06                      | 1.51E-08                       | 6.77E-04                                        |
|                                                      | France              | 0.141                                     | 0.153                             | 0.961                            | 1.72E-06                      | 1.52E-08                       | 6.80E-04                                        |
|                                                      | UK                  | 0.141                                     | 0.143                             | 0.961                            | 1.69E-06                      | 1.51E-08                       | 6.79E-04                                        |
|                                                      | Japan               | 0.145                                     | 0.146                             | 0.962                            | 1.71E-06                      | 1.56E-08                       | 8.65E-04                                        |
