# Supplementary material for: Life-Cycle Assessment of the Breezhaler® Breath-Actuated Dry Powder Inhaler
Source: MDPI journal article supplement (doi:10.3390/su13126657), 2021-06-11
Supplement: s1 [file s1]

Supplementary Table S1. Results Using RECIPE V1.04

|                                   |         | Global warming        | Stratospheric ozone depletion | Ionizing radiation | Ozone formation, Human health | Fine particulate matter formation | Ozone formation, Terrestrial ecosystems | Terrestrial acidification | Freshwater eutrophication | Marine eutrophication | Terrestrial ecotoxicity | Freshwater ecotoxicity | Marine ecotoxicity | Human carcinogenic activity | Human non-carcinogenic activity | Land use              | Mineral resource scarcity | Fossil resource scarcity | Water consumption |
|-----------------------------------|---------|-----------------------|-------------------------------|--------------------|-------------------------------|-----------------------------------|-----------------------------------------|---------------------------|---------------------------|-----------------------|-------------------------|------------------------|--------------------|-----------------------------|---------------------------------|-----------------------|---------------------------|--------------------------|-------------------|
|                                   |         | kg CO <sub>2</sub> eq | kg CFC11                      | kBq Co-60 eq       | kg NOx eq                     | kg PM2.5 eq                       | kg NOx eq                               | kg SO2 eq                 | kg P eq                   | kgN N eq              | kg 1,4-DCB              | kg 1,4-DCB             | kg 1,4-DCB         | kg 1,4-DCB                  | kg 1,4-DCB                      | m <sup>2</sup> a crop | kg Cu eq                  | kg oil eq                | m <sup>2</sup>    |
| 30- day with digital companion    | Germany | 0.448                 | 2.45E-07                      | 3.06E-03           | 1.01E-03                      | 7.65E-04                          | 1.04E-03                                | 1.63E-03                  | 3.50E-05                  | 1.29E-05              | 2.7                     | 1.29E-03               | 5.75E-03           | 6.54E-03                    | 0.204                           | 0.263                 | 6.35E-03                  | 0.141                    | 7.06E-03          |
|                                   | France  | 0.463                 | 2.61E-07                      | 3.05E-03           | 1.02E-03                      | 7.66E-04                          | 1.05E-03                                | 1.64E-03                  | 3.51E-05                  | 1.30E-05              | 2.66                    | 1.33E-03               | 5.79E-03           | 6.66E-03                    | 0.206                           | 0.263                 | 6.36E-03                  | 0.141                    | 7.11E-03          |
|                                   | Japan   | 0.472                 | 2.66E-07                      | 3.11E-03           | 1.30E-03                      | 8.54E-04                          | 1.33E-03                                | 1.92E-03                  | 3.51E-05                  | 1.30E-05              | 2.55                    | 1.31E-03               | 5.71E-03           | 6.70E-03                    | 0.205                           | 0.263                 | 6.36E-03                  | 0.143                    | 7.11E-03          |
|                                   | UK      | 0.469                 | 2.45E-07                      | 3.07E-03           | 1.01E-03                      | 7.67E-04                          | 1.04E-03                                | 1.64E-03                  | 3.50E-05                  | 1.85E-05              | 2.7                     | 1.29E-03               | 5.75E-03           | 6.54E-03                    | 0.204                           | 0.263                 | 6.35E-03                  | 0.141                    | 7.06E-03          |
|                                   |         |                       |                               |                    |                               |                                   |                                         |                           |                           |                       |                         |                        |                    |                             |                                 |                       |                           |                          |                   |
| 30- day without digital companion | Germany | 0.323                 | 1.64E-07                      | 1.88E-03           | 6.32E-04                      | 4.32E-04                          | 6.50E-04                                | 9.63E-04                  | 1.12E-05                  | 9.42E-06              | 0.99                    | 3.35E-04               | 8.59E-04           | 5.06E-03                    | 0.078                           | 0.186                 | 1.96E-03                  | 0.109                    | 5.78E-03          |
|                                   | France  | 0.338                 | 1.79E-07                      | 1.87E-03           | 6.41E-04                      | 4.33E-04                          | 6.59E-04                                | 9.66E-04                  | 1.13E-05                  | 9.51E-06              | 0.95                    | 3.49E-04               | 8.58E-04           | 5.17E-03                    | 0.08                            | 0.186                 | 1.97E-03                  | 0.108                    | 5.83E-03          |
|                                   | Japan   | 0.346                 | 1.85E-07                      | 1.92E-03           | 9.15E-04                      | 5.18E-04                          | 9.35E-04                                | 1.24E-03                  | 1.13E-05                  | 9.51E-06              | 0.84                    | 3.32E-04               | 7.81E-04           | 5.21E-03                    | 0.079                           | 0.186                 | 1.97E-03                  | 0.111                    | 5.83E-03          |
|                                   | UK      | 0.344                 | 1.65E-07                      | 1.88E-03           | 6.36E-04                      | 4.34E-04                          | 6.55E-04                                | 9.67E-04                  | 1.12E-05                  | 1.48E-05              | 0.99                    | 3.35E-04               | 8.57E-04           | 5.06E-03                    | 0.078                           | 0.186                 | 1.96E-03                  | 0.109                    | 5.78E-03          |
|                                   |         |                       |                               |                    |                               |                                   |                                         |                           |                           |                       |                         |                        |                    |                             |                                 |                       |                           |                          |                   |
| 90- day without digital companion | Germany | 0.139                 | 7.10E-08                      | 9.43E-04           | 2.82E-04                      | 2.04E-04                          | 2.90E-04                                | 4.58E-04                  | 5.32E-06                  | 3.90E-06              | 0.42                    | 1.52E-04               | 3.86E-04           | 2.98E-03                    | 0.042                           | 0.073                 | 1.03E-03                  | 0.045                    | 2.61E-03          |
|                                   | France  | 0.145                 | 7.73E-08                      | 9.39E-04           | 2.86E-04                      | 2.04E-04                          | 2.93E-04                                | 4.60E-04                  | 5.33E-06                  | 3.94E-06              | 0.41                    | 1.59E-04               | 3.86E-04           | 3.02E-03                    | 0.043                           | 0.073                 | 1.04E-03                  | 0.045                    | 2.63E-03          |
|                                   | Japan   | 0.149                 | 7.98E-08                      | 9.62E-04           | 4.05E-04                      | 2.41E-04                          | 4.13E-04                                | 5.77E-04                  | 5.34E-06                  | 3.96E-06              | 0.36                    | 1.52E-04               | 3.54E-04           | 3.04E-03                    | 0.042                           | 0.074                 | 1.04E-03                  | 0.046                    | 2.63E-03          |
|                                   | UK      | 0.146                 | 7.10E-08                      | 9.40E-04           | 2.84E-04                      | 2.04E-04                          | 2.91E-04                                | 4.60E-04                  | 5.33E-06                  | 5.96E-06              | 0.41                    | 1.50E-04               | 3.76E-04           | 2.98E-03                    | 0.042                           | 0.073                 | 1.03E-03                  | 0.045                    | 2.61E-03          |
