# Supplementary material for: Life-Cycle Assessment of the Breezhaler® Breath-Actuated Dry Powder Inhaler
Source: MDPI journal article supplement (doi:10.3390/su13126657), 2021-06-11
Supplement: s1 [file s1]

# 30-day devices with digital companion

| Germany                                         | Capsule production | Inhaler raw materials | Inhaler production energy | Digital companion raw materials | Digital companion production energy | Packaging | Distribution | Use | End of life |
|-------------------------------------------------|--------------------|-----------------------|---------------------------|---------------------------------|-------------------------------------|-----------|--------------|-----|-------------|
| Climate change (kg CO <sub>2</sub> eq)          | 0.0057             | 0.0995                | 0.1094                    | 0.1123                          | 0.0064                              | 0.0944    | 0.0075       | 0   | 0.0001      |
| Freshwater ecotoxicity (CTUe)                   | 0.0028             | 0.1298                | 0.0130                    | 0.2823                          | 0.0011                              | 0.1472    | 0.0324       | 0   | 0.0005      |
| Freshwater use (m <sup>3</sup> )                | 0.0209             | 0.4048                | 0.6163                    | 0.7265                          | 0.0186                              | 0.7558    | 0.0006       | 0   | 9.32E-06    |
| Resource depletion (kg Sb eq)                   | 2.52E-08           | 2.06E-06              | 1.32E-07                  | 6.58E-05                        | 1.45E-08                            | 2.08E-06  | 2.12E-09     | 0   | 3.13E-11    |
| Ozone depletion (kg CFC-11 eq)                  | 1.01E-09           | 3.35E-09              | 1.57E-08                  | 1.09E-08                        | 6.31E-10                            | 1.16E-08  | 1.44E-09     | 0   | 2.12E-11    |
| Acidification potential (mol H <sup>+</sup> eq) | 3.16E-05           | 4.02E-04              | 3.36E-04                  | 9.35E-04                        | 1.42E-05                            | 6.66E-04  | 1.54E-05     | 0   | 2.27E-07    |

| France                                          | Capsule production | Inhaler raw materials | Inhaler production energy | Digital companion raw materials | Digital companion production energy | Packaging | Distribution | Use | End of life |
|-------------------------------------------------|--------------------|-----------------------|---------------------------|---------------------------------|-------------------------------------|-----------|--------------|-----|-------------|
| Climate change (kg CO <sub>2</sub> eq)          | 0.0057             | 0.0995                | 0.1094                    | 0.1123                          | 0.0064                              | 0.0944    | 0.0057       | 0   | 0.0172      |
| Freshwater ecotoxicity (CTUe)                   | 0.0028             | 0.1298                | 0.0130                    | 0.2823                          | 0.0011                              | 0.1472    | 0.0245       | 0   | 0.0568      |
| Freshwater use (m <sup>3</sup> )                | 0.0209             | 0.4048                | 0.6163                    | 0.7265                          | 0.0186                              | 0.7558    | 0.0005       | 0   | 0.0013      |
| Resource depletion (kg Sb eq)                   | 2.52E-08           | 2.06E-06              | 1.32E-07                  | 6.58E-05                        | 1.45E-08                            | 2.08E-06  | 1.61E-09     | 0   | 4.59E-08    |
| Ozone depletion (kg CFC-11 eq)                  | 1.01E-09           | 3.35E-09              | 1.57E-08                  | 1.09E-08                        | 6.31E-10                            | 1.16E-08  | 1.09E-09     | 0   | 2.73E-10    |
| Acidification potential (mol H <sup>+</sup> eq) | 3.16E-05           | 4.02E-04              | 3.36E-04                  | 9.35E-04                        | 1.42E-05                            | 6.66E-04  | 1.17E-05     | 0   | 1.08E-05    |

| UK                                              | Capsule production | Inhaler raw materials | Inhaler production energy | Digital companion raw materials | Digital companion production energy | Packaging | Distribution | Use | End of life |
|-------------------------------------------------|--------------------|-----------------------|---------------------------|---------------------------------|-------------------------------------|-----------|--------------|-----|-------------|
| Climate change (kg CO <sub>2</sub> eq)          | 0.0057             | 0.0995                | 0.1094                    | 0.1123                          | 0.0064                              | 0.0944    | 0.0074       | 0   | 0.0177      |
| Freshwater ecotoxicity (CTUe)                   | 0.0028             | 0.1298                | 0.0130                    | 0.2823                          | 0.0011                              | 0.1472    | 0.0315       | 0   | 0.0009      |
| Freshwater use (m <sup>3</sup> )                | 0.0209             | 0.4048                | 0.6163                    | 0.7265                          | 0.0186                              | 0.7558    | 0.0006       | 0   | 0.0009      |
| Resource depletion (kg Sb eq)                   | 2.52E-08           | 2.06E-06              | 1.32E-07                  | 6.58E-05                        | 1.45E-08                            | 2.08E-06  | 2.09E-09     | 0   | 2.84E-10    |
| Ozone depletion (kg CFC-11 eq)                  | 1.01E-09           | 3.35E-09              | 1.57E-08                  | 1.09E-08                        | 6.31E-10                            | 1.16E-08  | 1.43E-09     | 0   | 3.82E-11    |
| Acidification potential (mol H <sup>+</sup> eq) | 3.16E-05           | 4.02E-04              | 3.36E-04                  | 9.35E-04                        | 1.42E-05                            | 6.66E-04  | 2.01E-05     | 0   | 2.92581E-06 |

| Japan                                           | Capsule production | Inhaler raw materials | Inhaler production energy | Digital companion raw materials | Digital companion production energy | Packaging | Distribution | Use | End of life |
|-------------------------------------------------|--------------------|-----------------------|---------------------------|---------------------------------|-------------------------------------|-----------|--------------|-----|-------------|
| Climate change (kg CO <sub>2</sub> eq)          | 0.0057             | 0.0995                | 0.1094                    | 0.1123                          | 0.0064                              | 0.0944    | 0.0144       | 0   | 0.0167      |
| Freshwater ecotoxicity (CTUe)                   | 0.0028             | 0.1298                | 0.0130                    | 0.2823                          | 0.0011                              | 0.1472    | 0.0073       | 0   | 0.0547      |
| Freshwater use (m <sup>3</sup> )                | 0.0209             | 0.4048                | 0.6163                    | 0.7265                          | 0.0186                              | 0.7558    | 0.0011       | 0   | 0.0013      |
| Resource depletion (kg Sb eq)                   | 2.52E-08           | 2.06E-06              | 1.32E-07                  | 6.58E-05                        | 1.45E-08                            | 2.08E-06  | 3.05E-09     | 0   | 4.32E-08    |
| Ozone depletion (kg CFC-11 eq)                  | 1.01E-09           | 3.35E-09              | 1.57E-08                  | 1.09E-08                        | 6.31E-10                            | 1.16E-08  | 2.44E-09     | 0   | 2.71E-10    |
| Acidification potential (mol H <sup>+</sup> eq) | 3.16E-05           | 4.02E-04              | 3.36E-04                  | 9.35E-04                        | 1.42E-05                            | 6.66E-04  | 4.57E-04     | 0   | 1.06E-05    |

# 30-day devices without digital companion

| Germany                                         | Capsule production | Inhaler raw materials | Inhaler production energy | Packaging | Distribution | Use | End of life |
|-------------------------------------------------|--------------------|-----------------------|---------------------------|-----------|--------------|-----|-------------|
| Climate change (kg CO <sub>2</sub> eq)          | 0.0057             | 0.0995                | 0.1094                    | 0.0916    | 0.0072       | 0   | 0.0001      |
| Freshwater ecotoxicity (CTUe)                   | 0.0028             | 0.1298                | 0.0130                    | 0.1426    | 0.0311       | 0   | 0.0005      |
| Freshwater use (m <sup>3</sup> )                | 0.0209             | 0.4048                | 0.6163                    | 0.7447    | 0.0006       | 0   | 8.95E-06    |
| Resource depletion (kg Sb eq)                   | 2.52E-08           | 2.06E-06              | 1.32E-07                  | 2.02E-06  | 2.03E-09     | 0   | 3.00E-11    |
| Ozone depletion (kg CFC-11 eq)                  | 1.01E-09           | 3.35E-09              | 1.57E-08                  | 1.13E-08  | 1.38E-09     | 0   | 2.04E-11    |
| Acidification potential (mol H <sup>+</sup> eq) | 3.16E-05           | 4.02E-04              | 3.36E-04                  | 6.46E-04  | 1.48E-05     | 0   | 2.18E-07    |



| France                                          | Capsule production | Inhaler raw materials | Inhaler production energy | Packaging | Distribution | Use | End of life |
|-------------------------------------------------|--------------------|-----------------------|---------------------------|-----------|--------------|-----|-------------|
| Climate change (kg CO <sub>2</sub> eq)          | 0.0057             | 0.0995                | 0.1094                    | 0.0916    | 0.0055       | 0   | 0.0163      |
| Freshwater ecotoxicity (CTUe)                   | 0.0028             | 0.1298                | 0.0130                    | 0.1426    | 0.0236       | 0   | 0.0246      |
| Freshwater use (m <sup>3</sup> )                | 0.0209             | 0.4048                | 0.6163                    | 0.7447    | 0.0005       | 0   | 0.0013      |
| Resource depletion (kg Sb eq)                   | 2.52E-08           | 2.06E-06              | 1.32E-07                  | 2.02E-06  | 1.54E-09     | 0   | 4.39E-08    |
| Ozone depletion (kg CFC-11 eq)                  | 1.01E-09           | 3.35E-09              | 1.57E-08                  | 1.13E-08  | 1.05E-09     | 0   | 2.60E-10    |
| Acidification potential (mol H <sup>+</sup> eq) | 3.16E-05           | 4.02E-04              | 3.36E-04                  | 6.46E-04  | 1.12E-05     | 0   | 1.04E-05    |

| UK                                              | Capsule production | Inhaler raw materials | Inhaler production energy | Packaging | Distribution | Use | End of life |
|-------------------------------------------------|--------------------|-----------------------|---------------------------|-----------|--------------|-----|-------------|
| Climate change (kg CO <sub>2</sub> eq)          | 0.0057             | 0.0995                | 0.1094                    | 0.0916    | 0.0071       | 0   | 0.0171      |
| Freshwater ecotoxicity (CTUe)                   | 0.0028             | 0.1298                | 0.0130                    | 0.1426    | 0.0302       | 0   | 0.0008      |
| Freshwater use (m <sup>3</sup> )                | 0.0209             | 0.4048                | 0.6163                    | 0.7447    | 0.0006       | 0   | 0.0009      |
| Resource depletion (kg Sb eq)                   | 2.52E-08           | 2.06E-06              | 1.32E-07                  | 2.02E-06  | 2.01E-09     | 0   | 2.73E-10    |
| Ozone depletion (kg CFC-11 eq)                  | 1.01E-09           | 3.35E-09              | 1.57E-08                  | 1.13E-08  | 1.37E-09     | 0   | 3.67E-11    |
| Acidification potential (mol H <sup>+</sup> eq) | 3.16E-05           | 4.02E-04              | 3.36E-04                  | 6.46E-04  | 1.93E-05     | 0   | 2.81E-06    |

| Japan                                           | Capsule production | Inhaler raw materials | Inhaler production energy | Packaging | Distribution | Use | End of life |
|-------------------------------------------------|--------------------|-----------------------|---------------------------|-----------|--------------|-----|-------------|
| Climate change (kg CO <sub>2</sub> eq)          | 0.0057             | 0.0995                | 0.1094                    | 0.0916    | 0.0138       | 0   | 0.0159      |
| Freshwater ecotoxicity (CTUe)                   | 0.0028             | 0.1298                | 0.0130                    | 0.1426    | 0.0070       | 0   | 0.0225      |
| Freshwater use (m <sup>3</sup> )                | 0.0209             | 0.4048                | 0.6163                    | 0.7447    | 0.0010       | 0   | 0.0013      |
| Resource depletion (kg Sb eq)                   | 2.52E-08           | 2.06E-06              | 1.32E-07                  | 2.02E-06  | 2.93E-09     | 0   | 4.12E-08    |
| Ozone depletion (kg CFC-11 eq)                  | 1.01E-09           | 3.35E-09              | 1.57E-08                  | 1.13E-08  | 2.34E-09     | 0   | 2.58E-10    |
| Acidification potential (mol H <sup>+</sup> eq) | 3.16E-05           | 4.02E-04              | 3.36E-04                  | 6.46E-04  | 4.39E-04     | 0   | 1.02E-05    |



## 90-day devices without digital companion

| Germany                                         | Capsule production | Inhaler raw materials | Inhaler production energy | Packaging | Distribution | Use | End of life |
|-------------------------------------------------|--------------------|-----------------------|---------------------------|-----------|--------------|-----|-------------|
| Climate change (kg CO <sub>2</sub> eq)          | 0.0057             | 0.0332                | 0.0365                    | 0.0563    | 0.0031       | 0   | 4.60E-05    |
| Freshwater ecotoxicity (CTUe)                   | 0.0028             | 0.0433                | 0.0043                    | 0.0807    | 0.0134       | 0   | 0.0002      |
| Freshwater use (m <sup>3</sup> )                | 0.0209             | 0.1349                | 0.2054                    | 0.5991    | 0.0003       | 0   | 3.87E-06    |
| Resource depletion (kg Sb eq)                   | 2.52E-08           | 6.86E-07              | 4.39E-08                  | 9.35E-07  | 8.80E-10     | 0   | 1.30E-11    |
| Ozone depletion (kg CFC-11 eq)                  | 1.01E-09           | 1.12E-09              | 5.23E-09                  | 7.19E-09  | 5.98E-10     | 0   | 8.83E-12    |
| Acidification potential (mol H <sup>+</sup> eq) | 3.16E-05           | 1.34E-04              | 1.12E-04                  | 3.92E-04  | 6.40E-06     | 0   | 9.45E-08    |

| France                                          | Capsule production | Inhaler raw materials | Inhaler production energy | Packaging | Distribution | Use | End of life |
|-------------------------------------------------|--------------------|-----------------------|---------------------------|-----------|--------------|-----|-------------|
| Climate change (kg CO <sub>2</sub> eq)          | 0.0057             | 0.0332                | 0.0365                    | 0.0563    | 0.0024       | 0   | 0.0069      |
| Freshwater ecotoxicity (CTUe)                   | 0.0028             | 0.0433                | 0.0043                    | 0.0807    | 0.0102       | 0   | 0.0113      |
| Freshwater use (m <sup>3</sup> )                | 0.0209             | 0.1349                | 0.2054                    | 0.5991    | 0.0002       | 0   | 0.0006      |
| Resource depletion (kg Sb eq)                   | 2.52E-08           | 6.86E-07              | 4.39E-08                  | 9.35E-07  | 6.67E-10     | 0   | 2.63E-08    |
| Ozone depletion (kg CFC-11 eq)                  | 1.01E-09           | 1.12E-09              | 5.23E-09                  | 7.19E-09  | 4.53E-10     | 0   | 1.60E-10    |
| Acidification potential (mol H <sup>+</sup> eq) | 3.16E-05           | 1.34E-04              | 1.12E-04                  | 3.92E-04  | 4.85E-06     | 0   | 4.59E-06    |

| UK                                              | Capsule production | Inhaler raw materials | Inhaler production energy | Packaging | Distribution | Use | End of life |
|-------------------------------------------------|--------------------|-----------------------|---------------------------|-----------|--------------|-----|-------------|
| Climate change (kg CO <sub>2</sub> eq)          | 0.0057             | 0.0332                | 0.0365                    | 0.0563    | 0.0027       | 0   | 0.0066      |
| Freshwater ecotoxicity (CTUe)                   | 0.0028             | 0.0433                | 0.0043                    | 0.0807    | 0.0114       | 0   | 0.0003      |
| Freshwater use (m <sup>3</sup> )                | 0.0209             | 0.1349                | 0.2054                    | 0.5991    | 0.0002       | 0   | 0.0004      |
| Resource depletion (kg Sb eq)                   | 2.52E-08           | 6.86E-07              | 4.39E-08                  | 9.35E-07  | 7.62E-10     | 0   | 1.08E-10    |
| Ozone depletion (kg CFC-11 eq)                  | 1.01E-09           | 1.12E-09              | 5.23E-09                  | 7.19E-09  | 5.19E-10     | 0   | 1.55E-11    |
| Acidification potential (mol H <sup>+</sup> eq) | 3.16E-05           | 1.34E-04              | 1.12E-04                  | 3.92E-04  | 7.58E-06     | 0   | 1.12E-06    |

| Japan                                           | Capsule production | Inhaler raw materials | Inhaler production energy | Packaging | Distribution | Use | End of life |
|-------------------------------------------------|--------------------|-----------------------|---------------------------|-----------|--------------|-----|-------------|
| Climate change (kg CO <sub>2</sub> eq)          | 0.0057             | 0.0332                | 0.0365                    | 0.0563    | 0.0060       | 0   | 0.0071      |
| Freshwater ecotoxicity (CTUe)                   | 0.0028             | 0.0433                | 0.0043                    | 0.0807    | 0.0030       | 0   | 0.0115      |
| Freshwater use (m <sup>3</sup> )                | 0.0209             | 0.1349                | 0.2054                    | 0.5991    | 0.0004       | 0   | 0.0009      |
| Resource depletion (kg Sb eq)                   | 2.52E-08           | 6.86E-07              | 4.39E-08                  | 9.35E-07  | 1.27E-09     | 0   | 2.0E-08     |
| Ozone depletion (kg CFC-11 eq)                  | 1.01E-09           | 1.12E-09              | 5.23E-09                  | 7.19E-09  | 1.01E-09     | 0   | 7.3E-11     |
| Acidification potential (mol H <sup>+</sup> eq) | 3.16E-05           | 1.34E-04              | 1.12E-04                  | 3.92E-04  | 1.90E-04     | 0   | 4.6E-06     |
