# Supplementary material for: Life-Cycle Assessment of the Breezhaler® Breath-Actuated Dry Powder Inhaler
Source: MDPI journal article supplement (doi:10.3390/su13126657), 2021-06-11
Supplement: s1 [file s1]

Archive with 4 entries (4 files):
- Figure S1.pdf
- Table S1.pdf
- Table S2.pdf
- Table S3.pdf
